# Supplementary material
Source: PubMed Central journal article supplement (PMC2795657)
Supplement: jc.2009-0839_1.pdf [file jc.2009-0839_1.pdf]

|                          | <u>PCOS</u>             |                  | <u>Control</u>   |                  | <u>PCOS/CTL Dx/Time</u> |               |
|--------------------------|-------------------------|------------------|------------------|------------------|-------------------------|---------------|
|                          | <u>Younger</u>          | <u>Older</u>     | <u>Younger</u>   | <u>Older</u>     | <u>pvalue</u>           | <u>pvalue</u> |
| Age (yrs)                | 36 (29-41) <sup>1</sup> | 45 (40,56)*      | 36 (26,42)       | 45 (40,56)*      | 0.5                     | 0.1           |
| BMI (kg/m <sup>2</sup> ) | 34 (19,49)              | 31 (21,43)       | 21 (18,31)       | 24 (20,39)       | 0.01                    | 0.2           |
| Waist to Hip Ratio       | 0.88 (0.70,0.96)        | 0.89 (0.77,1.07) | 0.84 (0.71,0.92) | 0.89 (0.77,0.96) | 0.7                     | 0.7           |
| SBP (mm Hg)              | 124 (106,142)           | 120 (100,140)    | 110 (100,132)    | 118 (100,134)    | 0.004                   | 0.04          |
| DBP (mm Hg)              | 78 (60,90)              | 80 (60,90)       | 70 (60,92)       | 78 (62,90)       | 0.4                     | 0.9           |
| Pulse (beats/min)        | 72 (56,80)              | 74 (60,88)       | 64 (56,80)       | 68 (48,80)       | 0.4                     | 0.6           |
| Ferriman Gallwey         | 12 (5,25)               | 7 (2,22)*        | 6 (2,8)          | 5 (2,13)         | <0.001                  | 0.02          |
| # Acne                   | 6/11                    | 3/11             | 4/15             | 6/15             | 0.55                    |               |
| # Acanthosis             | 2/11                    | 5/11             | 0/15             | 0/15             | 0.005                   |               |

<sup>1</sup>Results are expressed as median (minimum, maximum), with the exception of acne and acanthosis.

Data are analyzed using a random effects analysis of covariance model. Asterisks indicate differences between older and younger women within the PCOS and control groups. The intercept difference was used to estimate a mean baseline difference between younger PCOS and control subjects (PCOS/CTL p value) and the slope difference to estimate an interaction between group and time (Dx/Time p value).
